# Supplementary material
Source: PubMed Central journal article supplement (PMC5272921)
Supplement: NIHMS841567-supplement-supplemental.pdf [file NIHMS841567-supplement-supplemental.pdf]

## Online Supplementary Appendix

### Contents

eTable 1. Potential applications of probabilistic bias analysis in pharmacoepidemiologic and comparative effectiveness research.

eTable 2. Examples of simple bias analysis formulas

eTable 3. General description of eligible pharmacoepidemiologic studies published in 2010-2015 and included in the systematic review

eTable 4. Comparison of original study results with probabilistic bias analysis results when simulating an unmeasured confounder

eTable 5. Comparison of original study results with probabilistic bias analysis when simulating misclassification

eFigure 1. Common probability distributions assigned to bias parameters – simulating sensitivity as an example.

.

**eTable 1. Potential applications of probabilistic bias analysis in pharmacoepidemiologic and comparative effectiveness research.**

| Type of bias                                          | Application                                                                                                                                                                                                         | Example*                                                                                                                                                                                                                                                                                                               |
|-------------------------------------------------------|---------------------------------------------------------------------------------------------------------------------------------------------------------------------------------------------------------------------|------------------------------------------------------------------------------------------------------------------------------------------------------------------------------------------------------------------------------------------------------------------------------------------------------------------------|
| Unmeasured confounding                                | Studies using claims data are likely missing information on potentially important confounders (e.g. lifestyle or severity of symptoms). Probabilistic bias analysis can be used to simulate unmeasured confounders. | Bannister-Tyrell et al. used expert judgement and prior studies to simulate the effects of severe labor pain on the association between epidural labor analgesia and Cesarean delivery. <sup>31</sup>                                                                                                                  |
| Misclassification                                     | Many exposures, outcomes, and covariates in pharmacoepidemiologic studies are measured with error. Probabilistic bias analysis can be used to simulate the effects of misclassification on study results.           | Huybrechts et al. used an internal validation study (comparing outcome defined using claims data to hospital reports) to examine the effects of nondifferential outcome misclassification on the association between specific antidepressant use during pregnancy and cardiac malformations in newborns. <sup>39</sup> |
| Selection bias – differential selection probabilities | Probabilistic bias analysis can be applied to scenarios in which there is concern that selection into the study was affected by both exposure and outcome.                                                          | Our systematic review found no example. However, one could imagine being concerned of unequal selection probabilities in a case-control study where more cases participated than controls.                                                                                                                             |
| Selection bias – differential loss to follow-up       | Probabilistic bias analysis can be used to simulate the effects of differential loss to follow-up – a common concern in cohort studies                                                                              | Our systematic review found no examples. However, Lash and Fink simulated the effects of differential loss to follow-up on the association between less-than-definitive therapy (vs. definitive therapy) on breast cancer mortality. <sup>18</sup>                                                                     |
| Multiple biases                                       | Probabilistic bias analysis can incorporate multiple forms of bias.                                                                                                                                                 | We found no examples applying probabilistic bias analysis to multiple sources. However, one could imagine implementing such an approach to                                                                                                                                                                             |

examine both outcome misclassification and an unmeasured confounder in a retrospective cohort study using claims data, for example.

---

\*We used examples from studies in our systematic review when available. For some scenarios, we were unavailable to provide examples from included studies, and we used earlier examples from the literature or hypothetical scenarios to illustrate how probabilistic bias analysis could be implemented.

eTable 2. Examples of simple bias analysis formulas that can be applied to crude effect estimates<sup>2,\*†</sup>

| Type of bias simulated                                 | Simple bias formulas                                                                                                                                                                                                                                                                                                                                                                                                                                                                                               | Notation                                                                                                                                                                                                                                                                                                                                                                                                                                                                                                                                                                                                                                                                                                                                                                                            |
|--------------------------------------------------------|--------------------------------------------------------------------------------------------------------------------------------------------------------------------------------------------------------------------------------------------------------------------------------------------------------------------------------------------------------------------------------------------------------------------------------------------------------------------------------------------------------------------|-----------------------------------------------------------------------------------------------------------------------------------------------------------------------------------------------------------------------------------------------------------------------------------------------------------------------------------------------------------------------------------------------------------------------------------------------------------------------------------------------------------------------------------------------------------------------------------------------------------------------------------------------------------------------------------------------------------------------------------------------------------------------------------------------------|
| Unmeasured confounder (no effect measure modification) | $RR_{adj} = RR_{obs} \frac{RR_{CD}p_0 + (1 - p_0)}{RR_{CD}p_1 + (1 - p_1)}$                                                                                                                                                                                                                                                                                                                                                                                                                                        | <p><math>RR_{adj}</math>: bias-adjusted risk ratio<br/> <math>RR_{obs}</math>: crude risk ratio<br/> <math>RR_{CD}</math>: strength of confounder-outcome association<br/> <math>p_1</math>: Prevalence of confounder in exposed group<br/> <math>p_0</math>: Prevalence of confounder in unexposed group</p>                                                                                                                                                                                                                                                                                                                                                                                                                                                                                       |
| Exposure misclassification                             | $RR_{adj} = \frac{\frac{[a(PPV_{D+}) + b(1 - NPV_{D+})]}{[(a(PPV_{D+}) + b(1 - NPV_{D+})) + (c(PPV_{D-} + d(1 - NPV_{D-}))]}}{D_{+total} - [a(PPV_{D+}) + b(1 - NPV_{D+})]}}{\frac{[(D_{+total} - [a(PPV_{D+}) + b(1 - NPV_{D+})]) + (D_{-total} - (c(PPV_{D-} + d(1 - NPV_{D-})))]}{D_{+total} - [a(PPV_{D+}) + b(1 - NPV_{D+})]}}$                                                                                                                                                                               | <p><math>RR_{adj}</math>: bias-adjusted risk ratio<br/> <math>a</math>: observed exposed persons with outcome<br/> <math>b</math>: observed unexposed persons with outcome<br/> <math>c</math>: observed exposed persons without outcome<br/> <math>d</math>: observed unexposed persons without outcome<br/> <math>D_{+total}</math>: total persons with outcome<br/> <math>D_{-total}</math>: total persons without outcome<br/> <math>PPV_{D+}</math>: positive predictive value of exposure in persons with outcome<br/> <math>PPV_{D-}</math>: Positive predictive value of exposure in persons without outcome<br/> <math>NPV_{D+}</math>: negative predictive value of exposure in persons with outcome<br/> <math>NPV_{D-}</math>: negative predictive value in persons without outcome</p> |
| Outcome misclassification                              | $RR_{adj} = \frac{\frac{[a - E_{1total}(1 - SP_{E1})]}{[SE_{E1} - (1 - SP_{E1})]} / \left( \frac{[a - E_{1total}(1 - SP_{E1})]}{[SE_{E1} - (1 - SP_{E1})]} + \left( E_{1total} - \frac{[a - E_{1total}(1 - SP_{E1})]}{[SE_{E1} - (1 - SP_{E1})]} \right) \right)}{\frac{[b - E_{0total}(1 - SP_{E0})]}{[SE_{E0} - (1 - SP_{E0})]} / \left( \frac{[b - E_{0total}(1 - SP_{E0})]}{[SE_{E0} - (1 - SP_{E0})]} + \left( E_{0total} - \frac{[b - E_{0total}(1 - SP_{E0})]}{[SE_{E0} - (1 - SP_{E0})]} \right) \right)}$ | <p><math>RR_{adj}</math>: bias-adjusted risk ratio<br/> <math>a</math>: observed exposed persons with outcome<br/> <math>b</math>: observed unexposed persons with outcome<br/> <math>c</math>: observed exposed persons without outcome<br/> <math>d</math>: observed unexposed persons without outcome<br/> <math>E_{1total}</math>: total exposed persons<br/> <math>E_{0total}</math>: total unexposed persons<br/> <math>SE_{E1}</math>: outcome sensitivity in exposed<br/> <math>SE_{E0}</math>: outcome sensitivity in unexposed<br/> <math>SP_{E1}</math>: outcome specificity in exposed<br/> <math>SP_{E0}</math>: outcome specificity in unexposed</p>                                                                                                                                  |

Selection bias –  
unequal selection  
probabilities<sup>‡</sup>

$$OR_{adj} = OR_{obs} \times \frac{S_{case,0}S_{control,1}}{S_{case,1}S_{control,0}}$$

$OR_{adj}$ : bias-adjusted odds ratio  
 $OR_{obs}$ : crude odds ratio  
 $S_{case,1}$ : selection probability for exposed cases  
 $S_{case,0}$ : selection probability for unexposed cases  
 $S_{control,1}$ : selection probability for exposed controls  
 $S_{control,0}$ : selection probability for unexposed control

Selection bias –  
loss to follow-up

$$IRR_{adj} = \frac{\frac{Incidence_{obs,1} + Incidence_{LTF,1}}{Personyears_{obs,1} + Personyears_{LTF,1}}}{\frac{Incidence_{obs,0} + Incidence_{LTF,0}}{Personyears_{obs,0} + Personyears_{LTF,0}}}$$

$IRR_{adj}$ : bias-adjusted incidence rate ratio  
 $Incidence_{obs,1}$ : number of observed exposed persons who developed outcome  
 $Personyears_{obs,1}$ : person-years of follow-up for observed exposed persons  
 $Incidence_{LTF,1}$ : hypothesized number of exposed persons lost to follow-up who developed outcome  
 $Personyears_{LTF,1}$ : hypothesized person-years of follow-up for exposed persons who were lost to follow-up  
 $Incidence_{obs,0}$ : number of observed unexposed persons who developed outcome  
 $Personyears_{obs,0}$ : person-years of follow-up for observed unexposed persons  
 $Incidence_{LTF,0}$ : hypothesized number of unexposed persons lost to follow-up who developed outcome  
 $Personyears_{LTF,0}$ : hypothesized person-years of follow-up for unexposed persons who were lost to follow-up

---

\*The formula notation is heavily adapted is from Lash, Fox, and Fink 2009.<sup>2</sup> This table provides examples of simple bias analysis formulas that can be applied to crude effect estimates using probabilistic bias analysis; it is not meant to be a comprehensive list of all plausible bias-adjustment formulas. Extensive discussions on simple bias analysis are provided elsewhere.<sup>2,7,11</sup>

<sup>†</sup> All variables are assumed to be binary in the formulas provided. All formulas assume a cohort study design unless otherwise noted.

<sup>‡</sup>Notation assumes a case-control study design; the formula can be easily adapted to a cohort study design.

**eTable 3. General description of eligible pharmacoepidemiologic in 2010-2015 and included in the systematic review, sorted by bias addressed**

| Reference (Year)                             | Study design | Data Source                                                                                                                             | Exposure contrast                                                            | Outcome                                                                                                      |
|----------------------------------------------|--------------|-----------------------------------------------------------------------------------------------------------------------------------------|------------------------------------------------------------------------------|--------------------------------------------------------------------------------------------------------------|
| <b>Unmeasured Confounding</b>                |              |                                                                                                                                         |                                                                              |                                                                                                              |
| Albert et al. (2012) <sup>30</sup>           | Cohort       | Surveillance, Epidemiology, and End Results-Medicare Data, diagnoses 1999-2002 and follow-up through 2007                               | Radiation therapy versus no treatment within the first 9 months of diagnosis | Mastectomy (Binary)                                                                                          |
| Bannister-Tyrell et al. (2014) <sup>31</sup> | Cohort       | New South Wales Perinatal Collection and Admitted Patients Data Collection, 2007-2010                                                   | Epidural labor analgesia versus no treatment                                 | Cesarean delivery (Binary)                                                                                   |
| Corrao et al. (2011) <sup>32</sup>           | Cohort       | National Health Service data (diagnosis on hospital discharge and outpatient drug claims) Lombardy, Italy, 2000-2007                    | High versus very low adherence to blood pressure medication                  | First hospitalization for coronary or cerebrovascular events (Time to event)                                 |
| Corrao et al. (2014) <sup>33</sup>           | Cohort       | National Health Service data (diagnosis on hospital discharge, outpatient visits and outpatient drug claims) Lombardy, Italy, 2003-2010 | High versus very low adherence to statins                                    | First diabetes hospitalization or anti-diabetic medication dispensation (Time to event)                      |
| Corrao et al. (2014) <sup>34</sup>           | Cohort       | National Health Service data (diagnosis on hospital discharge, outpatient visits and outpatient drug claims) Lombardy, Italy, 2008-2011 | Generic versus brand-name simvastatin use                                    | Discontinuation of simvastatin; first hospitalization for coronary or cerebrovascular events (Time to event) |
| Corrao et al.                                | Case-control | National Health Service data                                                                                                            | Initial blood pressure                                                       | Hospitalization for                                                                                          |

|                                      |              |                                                                                                                                                                          |                                                                                                         |                                                       |
|--------------------------------------|--------------|--------------------------------------------------------------------------------------------------------------------------------------------------------------------------|---------------------------------------------------------------------------------------------------------|-------------------------------------------------------|
| (2011) <sup>29*</sup>                |              | (diagnosis on hospital discharge and outpatient drug claims) Lombardy, Italy, 2000-2007                                                                                  | medication combination therapy versus monotherapy                                                       | coronary or cerebrovascular events (Binary)           |
| Corrao et al. (2013) <sup>35</sup>   | Case-control | National Health Service data (diagnosis on hospital discharge and outpatient drug claims) Lombardy, Italy, 2003-2010                                                     | Long-term statin use versus statin use between two and six months                                       | Dementia hospitalization (Binary)                     |
| Ghirardi et al. (2014) <sup>36</sup> | Case-control | National Health Service data (hospitalization and outpatient drug claims) from 13 Italian territorial units in the Bisphosphonates Effectiveness-Safety Tradeoff Project | 3 exposure groups: $\geq 2$ years bisphosphonate use versus 1-2 years use, <1 year use                  | Hospitalization for osteoporotic fracture (Binary)    |
| Schmidt et al. (2010) <sup>37</sup>  | Case-control | Danish National Patient Registry /Danish Civil Registration System, Northern Jutland and Aarhus County, 1997-2008                                                        | Four exposure groups: Low dose acetylsalicylic acid use; dipyridamole use; use of both versus never use | Hospitalization for sub-arachnoid hemorrhage (Binary) |

#### Misclassification

|                                        |        |                                                           |                                                                               |                                                       |
|----------------------------------------|--------|-----------------------------------------------------------|-------------------------------------------------------------------------------|-------------------------------------------------------|
| Ahrens et al. (2012) <sup>38</sup>     | Cohort | Slone Birth Defects Study, 2006-2011                      | Influenza vaccination during pregnancy versus no vaccination during pregnancy | Preterm birth (Time to event)                         |
| Brunet et al. (2015) <sup>43</sup>     | Cohort | Canadian Co-Infection Cohort Study, 2003-2013             | Self-reported prescribed or illicit use of opioids versus no use              | Time to progression to liver fibrosis (Time to event) |
| Huybrechts et al. (2014) <sup>39</sup> | Cohort | Medicaid Analytic eXtract excluding Arizona, Connecticut, | Specific antidepressant types versus no use in                                | Inpatient or outpatient claim for                     |

|                                      |              |                                                                                                                             |                                                                                                                                                                                                              |                                                                                                          |
|--------------------------------------|--------------|-----------------------------------------------------------------------------------------------------------------------------|--------------------------------------------------------------------------------------------------------------------------------------------------------------------------------------------------------------|----------------------------------------------------------------------------------------------------------|
|                                      |              | Michigan, and Montana, includes hospitalization and outpatient physician services and prescription claims, 2000-2007        | first trimester only                                                                                                                                                                                         | specific types of cardiac malformations (Binary)                                                         |
| Palmsten et al. (2013) <sup>40</sup> | Cohort       | Medicaid Analytic eXtract, includes hospitalization and outpatient physician services and prescription claims, 2000-2007    | Antidepressant dispensed between 90-225 gestational days versus no antidepressant claim between last menstrual period and 225 gestational day                                                                | Inpatient or outpatient claim for preeclampsia or eclampsia (Binary)                                     |
| Barron et al. (2013) <sup>41</sup>   | Case-control | National Cancer Registry Ireland linked to prescription dispensing data from Primary Care Reimbursement Services, 2002-2007 | Non-persistence to hormonal therapy versus persistent; non-compliant hormonal therapy versus compliant, low-cumulative hormonal therapy versus high cumulative<br><br>Tertiles of proportion of days covered | Early local or distant breast cancer recurrence (within 4 years of initiating hormonal therapy) (Binary) |
| Mahmud et al. (2011) <sup>42</sup>   | Case-control | Saskatchewan Ministry of Health databases and Saskatchewan Cancer Registry, 1985-2000                                       | Specific non-steroidal anti-inflammatory drug use versus never users                                                                                                                                         | Prostate cancer (Binary)                                                                                 |

---

\*We selected the first of two articles using probabilistic bias analysis on the same study sample [Excluded: Corrao G, Nicotra F, Parodi A, Zambon A, Soranna D, Heiman F, Merlino L, Mancina G. External adjustment for unmeasured confounders improved drug-outcome association estimates based on health care utilization data. J Clin Epidemiol 2012;65:1190-1199.]



**eTable 4. Comparison of original results with probabilistic bias analysis results when simulating an unmeasured confounder, sorted by study design.\***

| Reference (Year)                             | Simulation presentation <sup>†</sup> | Type of probability distribution assigned <sup>‡</sup> | Estimate of confounder prevalence in exposed and unexposed                                                                                                                                              | Associations between confounder and outcome                                                     | Conventional results         | Bias analysis results                                                                                           | % Change in estimate from conventional analysis <sup>§</sup>     | % Change in interval width from conventional analysis**          |
|----------------------------------------------|--------------------------------------|--------------------------------------------------------|---------------------------------------------------------------------------------------------------------------------------------------------------------------------------------------------------------|-------------------------------------------------------------------------------------------------|------------------------------|-----------------------------------------------------------------------------------------------------------------|------------------------------------------------------------------|------------------------------------------------------------------|
| <b>Cohort studies</b>                        |                                      |                                                        |                                                                                                                                                                                                         |                                                                                                 |                              |                                                                                                                 |                                                                  |                                                                  |
| Albert et al. (2012) <sup>30</sup>           | Multiple scenarios                   | Not reported                                           | <b>Least biased:</b><br>P <sub>1</sub> =5% (range: 0–10%)<br>P <sub>0</sub> =50% (range: 40–60%)<br><br><b>Most biased:</b><br>P <sub>1</sub> =15% (range:10–20%)<br>P <sub>0</sub> =85% (range:80–90%) | <b>Least biased:</b><br>HR=1.75<br><br><b>Most biased:</b><br>HR=3.32                           | HR=0.33<br>95% CI: 0.22–0.48 | <b>Least biased:</b><br>HR=0.32<br>95% SI: 0.20–0.54<br><br><b>Most biased:</b><br>HR=0.86<br>95% SI: 0.43–1.60 | <b>Least biased:</b><br>3.0<br><br><b>Most biased:</b><br>-160.6 | <b>Least biased:</b><br>30.8<br><br><b>Most biased:</b><br>350.0 |
| Bannister-Tyrell et al. (2014) <sup>31</sup> | Single scenario                      | Trapezoidal                                            | P <sub>1</sub> : Min=5%, Mode <sub>1</sub> =15%<br>Mode <sub>2</sub> = 25%, Max= 35%<br>P <sub>0</sub> : Min= 2%, Mode <sub>1</sub> = 4%,<br>Mode <sub>2</sub> =6%, Max=10%                             | RR:<br>Min=4,Mode <sub>1</sub> =7,<br>Mode <sub>2</sub> =10,<br>Max=12                          | RR=2.5<br>95% CI: 2.5–2.6    | RR=1.54<br>95% SI: 1.03–2.22                                                                                    | -38.4                                                            | 1090.0                                                           |
| Corrao et al. (2011) <sup>32</sup>           | Multiple scenarios <sup>††</sup>     | Not reported                                           | P <sub>1</sub> =1%<br>P <sub>0</sub> =20%                                                                                                                                                               | RR=1.71                                                                                         | HR=0.75<br>95% CI: 0.71–0.80 | HR=0.84<br>95% SI: 0.77–0.92                                                                                    | -12.0                                                            | 66.7                                                             |
| Corrao et al. (2014) <sup>33</sup>           | Continuous interval <sup>††</sup>    | Not reported                                           | Overall prevalence of 37.5%;<br>OR <sub>CE</sub> ranging 0.5-2.0.                                                                                                                                       | RR=3.0                                                                                          | HR=1.32<br>95% CI: 1.26–1.39 | HR=1.13<br>95% SI: 1.00–1.28                                                                                    | -14.4                                                            | 115.0                                                            |
| Corrao et al. (2014) <sup>34</sup>           | Continuous interval <sup>††</sup>    | Not reported                                           | <b>Least biased:</b><br>Overall prevalence of 35%;<br>OR <sub>CE</sub> ranging 1.0-10.0<br><br><b>Most biased:</b><br>Overall prevalence of 35%;<br>OR <sub>CE</sub> ranging 1.0-10.0                   | <b>Least biased:</b><br>RR=1.21<br><br><b>Most biased:</b><br>RR=1.21                           | HR=1.06<br>95% CI: 0.83–1.34 | <b>Least biased:</b><br>HR=1.05<br>95% SI: 0.81–1.33<br><br><b>Most biased:</b><br>HR=1.09<br>95% SI: 0.85-1.40 | <b>Least biased:</b><br>-0.9<br><br><b>Most biased:</b><br>2.8   | <b>Least biased:</b><br>2.0<br><br><b>Most biased:</b><br>7.8    |
| <b>Case-control studies</b>                  |                                      |                                                        |                                                                                                                                                                                                         |                                                                                                 |                              |                                                                                                                 |                                                                  |                                                                  |
| Corrao et al. (2011) <sup>29</sup>           | Multiple scenarios <sup>††</sup>     | Normal (association only) <sup>§§</sup>                | <b>Least biased:</b><br>P <sub>1</sub> =17.3<br>P <sub>0</sub> =11.9<br><br><b>Most biased:</b><br>P <sub>1</sub> =17.3<br>P <sub>0</sub> =11.9                                                         | <b>Least biased:</b><br>RR=1.5 <sup>§§</sup><br><br><b>Most biased:</b><br>RR=5.0 <sup>§§</sup> | OR=0.89<br>95% CI: 0.84–0.95 | <b>Least biased:</b><br>OR=0.88<br>95% SI: 0.83–0.93<br><br><b>Most biased:</b><br>OR=0.81<br>95% SI: 0.76–0.86 | <b>Least biased:</b><br>1.0<br><br><b>Most biased:</b><br>9.0    | <b>Least biased:</b><br>-0.1<br><br><b>Most biased:</b><br>-0.1  |
| Corrao et al. (2013) <sup>35</sup>           | Multiple scenarios                   | Not reported                                           | <b>Least biased:</b><br>Overall prevalence of 35%;<br>OR <sub>CE</sub> =1.5<br><br><b>Most biased:</b><br>Overall prevalence of 35%;<br>OR <sub>CE</sub> =5.0                                           | <b>Least biased:</b><br>RR=1.5<br><br><b>Most biased:</b><br>RR=1.5                             | OR=0.75<br>95% CI: 0.61–0.94 | <b>Least biased:</b><br>OR=0.69<br>95% SI: 0.55–0.88<br><br><b>Most biased:</b><br>OR=0.54<br>95% SI: 0.43–0.68 | <b>Least biased:</b><br>8.0<br><br><b>Most biased:</b><br>28.0   | <b>Least biased:</b><br>0.0<br><br><b>Most biased:</b><br>-24.2  |
| Ghirardi et al. (2014) <sup>36</sup>         | Multiple scenarios                   | Not reported                                           | <b>Least biased:</b><br>P <sub>1</sub> =40%, P <sub>0</sub> =20<br><br><b>Most biased:</b>                                                                                                              | <b>Least biased:</b><br>RR=1.5<br><br><b>Most biased:</b>                                       | OR=0.79<br>95% CI: 0.67-0.93 | <b>Least biased:</b><br>OR=0.72<br>95% SI: 0.64–0.82<br><br><b>Most biased:</b>                                 | <b>Least biased:</b><br>8.9<br><br><b>Most biased:</b>           | <b>Least biased:</b><br>-30.8<br><br><b>Most biased:</b>         |

|                                     |                                |              | P <sub>1</sub> =40%, P <sub>0</sub> =20 | RR=2.5                                                | OR =0.64<br>95% SI: 0.56-0.74                                      | 19.0                                                               | -30.8                                    |                                                         |
|-------------------------------------|--------------------------------|--------------|-----------------------------------------|-------------------------------------------------------|--------------------------------------------------------------------|--------------------------------------------------------------------|------------------------------------------|---------------------------------------------------------|
| Schmidt et al. (2010) <sup>37</sup> | Single scenario <sup>***</sup> | Not reported | Not reported                            | <b>Least biased<sup>***</sup>:</b><br>RR ranging: 2-3 | <b>Least biased<sup>***</sup>:</b><br>OR=2.52<br>95% CI: 1.37-4.62 | <b>Least biased<sup>***</sup>:</b><br>OR=2.47<br>(SI not reported) | <b>Least biased<sup>***</sup>:</b><br>-2 | <b>Least biased<sup>***</sup>:</b><br>N/A <sup>§§</sup> |
|                                     |                                |              |                                         | <b>Most biased<sup>***</sup>:</b><br>RR ranging 2-3   | <b>Most biased<sup>***</sup>:</b><br>OR =2.09<br>95%: 1.04–4.23    | <b>Most biased<sup>***</sup>:</b><br>OR =1.88<br>(SI not reported) | <b>Most biased<sup>***</sup>:</b><br>-10 | <b>Most biased<sup>***</sup>:</b><br>N/A <sup>§§</sup>  |

CI, confidence interval; HR, hazard ratio; P<sub>1</sub>, prevalence of the confounder in the exposed ; OR<sub>CE</sub>, exposure-confounder odds ratio; P<sub>0</sub>, prevalence of the unmeasured confounder in the unexposed; RR, relative risk; SI, simulation interval.

\*When multiple scenarios were simulated, we tried to present the least and most extreme bias simulations (defined by looking at changes in the effect estimate). In some studies, many scenarios were visually displayed but the exact values of the effect estimate and interval were not available; in this case, we have presented the corrected estimates and intervals discussed in the text.

†Simulation results were presented as single discrete scenarios, multiple discrete scenarios, or applied over a continuous interval of plausible bias parameters. See Methods for further description.

‡See eFigure1 for further description of probability distribution types.

§When conventional effect estimate was <1, estimated as  $[\text{Effect estimate}_{\text{conventional}} - \text{Effect estimate}_{\text{probabilistic}}] / \text{Effect estimate}_{\text{conventional}} \times 100$ .

When conventional effect estimate was ≥1, estimated as  $[\text{Effect estimate}_{\text{probabilistic}} - \text{Effect estimate}_{\text{conventional}}] / \text{Effect estimate}_{\text{conventional}} \times 100$ .

\*\*Estimated as  $[\text{SI width}_{\text{probabilistic}} - \text{CI width}_{\text{conventional}}] / \text{CI width}_{\text{conventional}}$ . Interval width calculated as the upper interval bound – lower interval bound

††Although multiple scenarios or a range of plausible bias-adjusted estimates were generated, they were visually displayed. The estimates provided are for the example(s) discussed in the text .

‡‡Three separate unmeasured confounders were simulated using similar methods. Only one is presented for brevity (severity of hypertension).

§§Probability distribution type was provided for exposure-outcome association only. Investigators sampled the relative risk from a distribution with mean of ln(RR) and a variance of 0.04

\*\*\*This study applied a single bias scenario to two exposure-outcome associations. The least biased scenario was new use of low dose aspirin vs. no use and the most biased scenario was long-term use of dipyridamole vs. no use.

**eTable 5. Comparison of original results with probabilistic bias analysis results when simulating misclassification, sorted by study design.\***

| Reference (Year)                       | Misclassification simulated                                                       | Type of probability distribution assigned <sup>†</sup> | Sensitivity or PPV                                                                                                                                                                                                                                                                                                              | Specificity or NPV                                                                                                                                                                                                                                                                                                                | Conventional results                                                                                                                   | Bias analysis results                                                                                                                                                                                                                                                                      | % Change in estimate from conventional analysis <sup>‡</sup>                                                                                                                             | % Change in interval width from conventional analysis <sup>§</sup>                                                                                                                        |
|----------------------------------------|-----------------------------------------------------------------------------------|--------------------------------------------------------|---------------------------------------------------------------------------------------------------------------------------------------------------------------------------------------------------------------------------------------------------------------------------------------------------------------------------------|-----------------------------------------------------------------------------------------------------------------------------------------------------------------------------------------------------------------------------------------------------------------------------------------------------------------------------------|----------------------------------------------------------------------------------------------------------------------------------------|--------------------------------------------------------------------------------------------------------------------------------------------------------------------------------------------------------------------------------------------------------------------------------------------|------------------------------------------------------------------------------------------------------------------------------------------------------------------------------------------|-------------------------------------------------------------------------------------------------------------------------------------------------------------------------------------------|
| <b>Cohort studies</b>                  |                                                                                   |                                                        |                                                                                                                                                                                                                                                                                                                                 |                                                                                                                                                                                                                                                                                                                                   |                                                                                                                                        |                                                                                                                                                                                                                                                                                            |                                                                                                                                                                                          |                                                                                                                                                                                           |
| Ahrens et al. (2012) <sup>38</sup>     | Differential exposure misclassification                                           | Beta                                                   | Outcome: PPV=0.88, 95% SI: 0.82–0.93<br><br>No outcome: PPV=0.85, 95% SI: 0.79–0.90                                                                                                                                                                                                                                             | Not reported**                                                                                                                                                                                                                                                                                                                    | HR=1.00<br>95% CI: 0.71–1.41                                                                                                           | HR=1.04<br>95% SI: 0.70–1.52                                                                                                                                                                                                                                                               | 4                                                                                                                                                                                        | 17.1                                                                                                                                                                                      |
| Brunet et al. (2015) <sup>43</sup>     | Nondifferential exposure misclassification                                        | Trapezoidal                                            | Sensitivity: Min=45%, Mode <sub>1</sub> =50%, Mode <sub>2</sub> =60%, Max=99%                                                                                                                                                                                                                                                   | Specificity: Min=70%, Mode <sub>1</sub> =80%, Mode <sub>2</sub> =90%, Max=100%                                                                                                                                                                                                                                                    | HOR=1.20<br>95% CI: 0.73-1.67                                                                                                          | HOR=1.11<br>95% SI: 0.62–1.98                                                                                                                                                                                                                                                              | -7.5                                                                                                                                                                                     | 44.7                                                                                                                                                                                      |
| Huybrechts et al. (2014) <sup>39</sup> | Nondifferential outcome misclassification                                         | Triangular                                             | Sensitivity: Min=50%, Mode=75%, Max=100%                                                                                                                                                                                                                                                                                        | Specificity: Min=99.85%, Mode=99.875%, Max=99.9%                                                                                                                                                                                                                                                                                  | <b>Least biased:</b><br>RR=0.66<br>90% CI: 0.39–1.13<br><br><b>Most biased:</b><br>RR=1.13<br>90% CI: 0.83–1.52                        | <b>Least biased:</b><br>RR=0.65<br>90% SI: 0.36–1.20<br><br><b>Most biased:</b><br>RR=1.24<br>90% CI: 0.89–1.73                                                                                                                                                                            | <b>Least biased:</b><br>1.5<br><br><b>Most biased:</b><br>9.7                                                                                                                            | <b>Least biased:</b><br>13.5<br><br><b>Most biased:</b><br>53.6                                                                                                                           |
| Palmsten et al. (2013) <sup>40</sup>   | Nondifferential misclassification                                                 | Not reported                                           | Not reported <sup>††</sup>                                                                                                                                                                                                                                                                                                      | Not reported <sup>††</sup>                                                                                                                                                                                                                                                                                                        | <b>Least biased:</b><br>RR= 1.00<br>95% CI: 0.93–1.07<br><br><b>Most biased:</b><br>RR=1.52<br>95% CI: 1.26–1.83                       | <b>Least biased:</b><br>RR=1.00<br>95% SI: 0.91–1.09<br><br><b>Most biased:</b><br>RR= 2.16<br>95% SI: 1.38–3.37                                                                                                                                                                           | <b>Least biased:</b><br>0.0<br><br><b>Most biased:</b><br>42.1                                                                                                                           | <b>Least biased:</b><br>28.6<br><br><b>Most biased:</b><br>249.1                                                                                                                          |
| <b>Case-control studies</b>            |                                                                                   |                                                        |                                                                                                                                                                                                                                                                                                                                 |                                                                                                                                                                                                                                                                                                                                   |                                                                                                                                        |                                                                                                                                                                                                                                                                                            |                                                                                                                                                                                          |                                                                                                                                                                                           |
| Barron et al. (2013) <sup>41</sup>     | Nondifferential outcome misclassification; differential outcome misclassification | Trapezoidal                                            | <i>Nondifferential:</i><br>Sensitivity: Min=70%, Mode <sub>1</sub> =75%, Mode <sub>2</sub> =85%, Max=90%<br><br><i>Differential:</i><br>Exposed, sensitivity: Min=70%, Mode <sub>1</sub> =75%, Mode <sub>2</sub> =85%, Max=90%<br><br>Unexposed: sensitivity: Min=80%, Mode <sub>1</sub> =85%, Mode <sub>2</sub> =95%, Max=100% | <i>Nondifferential:</i><br>Specificity: Min=94%, Mode <sub>1</sub> =96%, Mode <sub>2</sub> =98%, Max=100%<br><br><i>Differential:</i><br>Exposed, specificity: Min=94%, Mode <sub>1</sub> =96%, Mode <sub>2</sub> =98%, Max=100%<br><br>Unexposed, specificity: Min=95%, Mode <sub>1</sub> =97%, Mode <sub>2</sub> =99%, Max=100% | <b>Least biased:</b><br>OR= 1.30<br>95% CI: 0.74–2.30<br><br><b>Most biased:</b><br>OR= 2.88<br>95% CI: 1.11–7.46                      | <i>Nondifferential:</i><br><b>Least biased:</b><br>OR=1.35<br>95% SI: 0.73–2.60<br><br><b>Most biased:</b><br>OR=4.0<br>95% SI: 1.39–12.30<br><br><i>Differential:</i><br><b>Least biased:</b><br>OR=1.46<br>95% SI: 0.77–2.81<br><br><b>Most biased:</b><br>OR=4.29<br>95% SI: 1.51–12.79 | <i>Nondifferential:</i><br><b>Least biased:</b><br>3.8<br><br><b>Most biased:</b><br>38.9<br><br><i>Differential:</i><br><b>Least biased:</b><br>12.3<br><br><b>Most biased:</b><br>49.0 | <i>Nondifferential:</i><br><b>Least biased:</b><br>19.9<br><br><b>Most biased:</b><br>71.8<br><br><i>Differential:</i><br><b>Least biased:</b><br>30.8<br><br><b>Most biased:</b><br>77.6 |
| Mahmud et al. (2011) <sup>42</sup>     | Nondifferential exposure misclassification                                        | Not reported                                           | Not reported                                                                                                                                                                                                                                                                                                                    | Not reported                                                                                                                                                                                                                                                                                                                      | <b>Scenario 1<sup>††</sup>:</b><br>OR=0.90<br>95% CI: 0.84-0.95<br><br><b>Scenario 2<sup>††</sup>:</b><br>OR=1.01<br>95% CI: 0.95-1.07 | Not reported <sup>††</sup>                                                                                                                                                                                                                                                                 | N/A <sup>††</sup>                                                                                                                                                                        | N/A <sup>††</sup>                                                                                                                                                                         |

CI, confidence interval; HOR, hazard odds ratio; HR, hazard ratio; NPV, negative predictive value; PPV, positive predictive value; RR, relative risk; SI, simulation interval.

\*When misclassification was simulated for multiple exposure-outcome associations, we presented the least and most extreme bias simulations (defined by looking at changes in the effect estimate).

†See eFigure1 for further description of probability distribution types.

‡When conventional effect estimate was <1, estimated as  $[\text{Effect estimate}_{\text{conventional}} - \text{Effect estimate}_{\text{probabilistic}}] / \text{Effect estimate}_{\text{conventional}} * 100$ .

When conventional effect estimate was  $\geq 1$ , estimated as  $[\text{Effect estimate}_{\text{probabilistic}} - \text{Effect estimate}_{\text{conventional}}] / \text{Effect estimate}_{\text{conventional}} * 100$ .

§Estimated as  $[\text{SI width}_{\text{probabilistic}} - \text{CI width}_{\text{conventional}}] / \text{CI width}_{\text{conventional}}$ . Interval width calculated as the upper interval bound – lower interval bound

\*\*Sensitivity and specificity point estimates for calculating negative predictive value were provided (Sensitivity=95%, Specificity=90%)

††Investigators reported that they “used plausible estimates” of sensitivity and specificity based on positive predictive values from internal validation study

‡‡Investigators did not report any quantitative results from bias analysis; they only discussed findings qualitatively. Scenario 1 compares any use of propionates vs. never users. Scenario 2 compares any aspirin use vs. never users.

**eFigure 1. Common probability distributions assigned to bias parameters  
– simulating sensitivity as an example.**

**A. Uniform distribution**

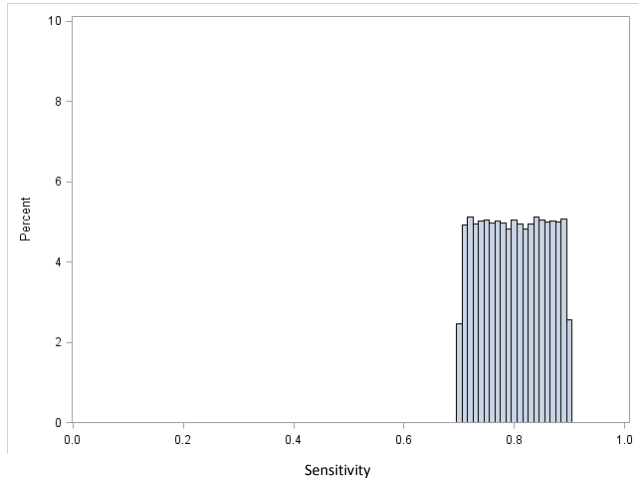

**B. Trapezoidal distribution**

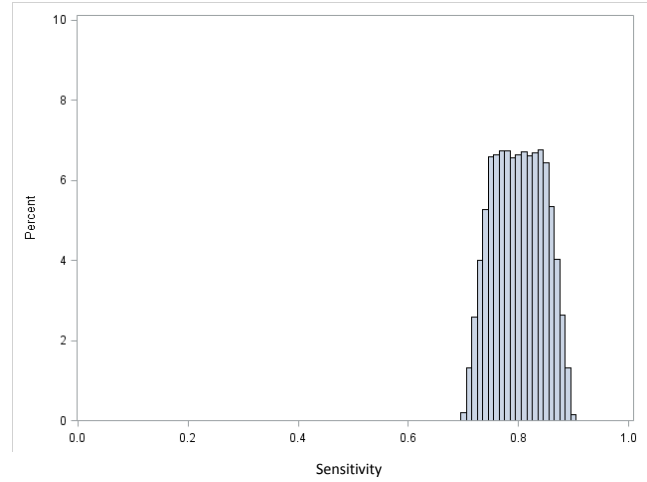

**C. Triangular distribution**

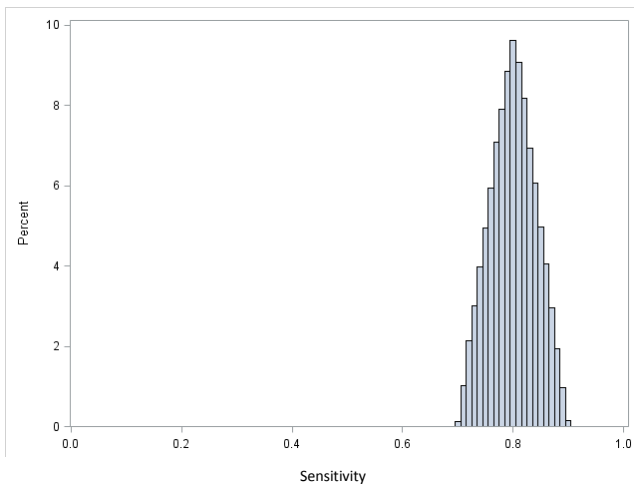

**D. Truncated normal distribution**

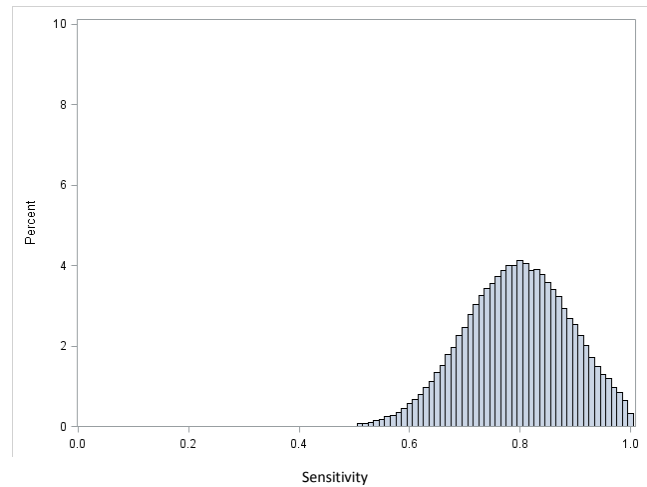

**E. Beta distribution**

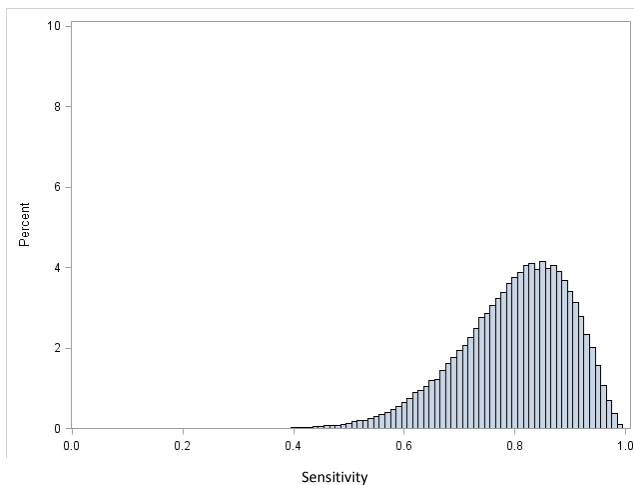

**eFigure 1** shows five commonly simulated probability distributions assigned to bias parameters (simulating plausible distributions for sensitivity as an example). Panel A simulates a uniform probability distribution for sensitivity with a minimum=0.70 and a maximum=0.90. Uniform probability distributions assume that all values between the minimum and maximum are equally plausible. Panel B shows a trapezoidal probability distribution with minimum=0.70, mode<sub>1</sub>=0.75, mode<sub>2</sub>=0.85, and maximum=0.90. Trapezoidal distributions assume that values between mode<sub>1</sub> and mode<sub>2</sub> are equally plausible but assume linear decreases in the probability density between the modes and the tails of the distribution (the minimum and maximum). Panel C shows a triangular distribution with minimum=0.70, mode=0.80, maximum=0.90. Triangular distributions assume a linear decrease from the mode to the distribution tails. Panel D shows a truncated normal distribution with mean=0.8 and standard deviation=0.1; the distribution has been truncated at 1.0 because a sensitivity > 1.0 is impossible. Panel E shows a beta distribution with mean=0.8 and a standard deviation=0.1 simulated with two shape parameters (here: alpha=12; beta=3). Beta distributions are bound between 0 and 1.

Different distribution types (including shape and type of probability distribution assigned) make different assumptions about bias parameters. For example, the uniform and triangular distributions (panels A and C) assume the same range of plausible bias parameters (min=0.70, max=0.90), but the triangular distribution assumes that 0.80 is the most likely value whereas the uniform distribution assumes that all values between the minimum and maximum are equally plausible. Alternatively – when comparing the uniform and beta distribution (panels A and E) – the beta distribution assumes a wider range of plausible values than the uniform distribution (uniform: min=0.70, max=0.90; beta: min=0.26, max=1.0), but values at the tails of the distribution are less likely than the mean/mode of 0.80. Further description of simulating bias parameter distributions is provided elsewhere.<sup>2</sup>
